# Supplementary material
Source: PubMed Central journal article supplement (PMC6645663)

# Development of a Fluorogenic Reactivity-Palette for the Study of Nucleophilic Addition Reactions Based on *meso*-Formyl BODIPY Dyes

*Lana E. Greene, Richard Lincoln, Katerina Krumova, Gonzalo Cosa\**

Department of Chemistry and Center for Self-Assembled Chemical Structures (CSACS-CRMAA), McGill University, 801 Sherbrooke Street West, Montreal, Quebec H3A 0B8, Canada

\*To whom correspondence should be addressed:

**Phone:** 1 (514) 398-6932 **Fax:** 1 (514) 398-3797 **Email:** gonzalo.cosa@mcgill.ca

*This section includes:*

- **Table S1.** Photophysical properties of dye **6** (page S2)
- **Figure S1.** Typical plot for determining fluorescent quantum yields (page S2)
- **Figure S2.** <sup>1</sup>H-NMR spectrum of 8-(1,3-dioxolane)-2-cyano-1,3,5,7-tetramethyl Pyrromethene Fluoroborate (**6**) (page S3).
- **Figure S3.** <sup>13</sup>C-NMR spectrum of 8-(1,3-dioxolane)-2-cyano-1,3,5,7-tetramethyl Pyrromethene Fluoroborate (**6**) (page S4).

**Table S1:** Photophysical properties of dye **6** and fluorescence lifetime of dye **5** in ethylene glycol (EtGly). Values are reported to the significant figure as dictated by the error.

| Dye      | Solvent | $\Phi_f$ | $\tau$ (ns) <sup>a</sup> | $k_{\text{rad}}$ (s <sup>-1</sup> ) <sup>b</sup> | $k_{\text{nr}}$ (s <sup>-1</sup> ) |
|----------|---------|----------|--------------------------|--------------------------------------------------|------------------------------------|
| <b>6</b> | EtGly   | 0.16     | 1.75 (69%)               | $1 \times 10^8$                                  | $6 \times 10^8$                    |
|          |         |          | 0.85 (31%)               |                                                  |                                    |
| <b>6</b> | MeCN    | 0.093    | 0.82 (68%)               | $1 \times 10^8$                                  | $1 \times 10^9$                    |
|          |         |          | 0.28 (32%)               |                                                  |                                    |
| <b>5</b> | EtGly   |          | 3.88 (81%)               |                                                  |                                    |
|          |         |          | 1.87 (19%)               |                                                  |                                    |

<sup>a</sup>Weights of bi-exponential lifetimes are given based on their pre-exponential factors (. <sup>b</sup>An average  $k_{\text{rad}}$  based on the weights of pre-exponential factors was used for biexponential lifetimes according to Equation 4).

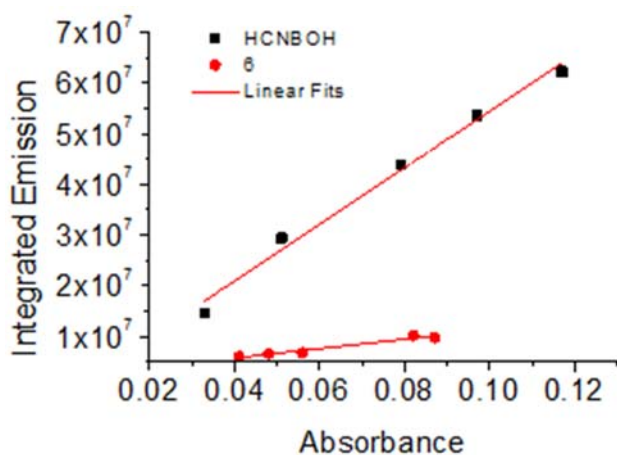

**Figure S1.** Typical plot for determining fluorescent quantum yields. Here, absorbance and emission were recorded for dye **6** and fluorescent standard HCNBOH (8-Hydroxymethyl-2-cyano-1,3,5,7-tetramethyl Pyrromethene Fluoroborate).<sup>1</sup> Slopes of the plots were used to calculate the quantum yield for **6** according to Equation 4 in the manuscript.

## References

- 1) Krumova, K.; Cosa, G. *J. Am. Chem. Soc.* **2010**, 132, 17560.

**Figure S3:**  $^1\text{H}$  NMR of **6**,  $\text{CDCl}_3$ , 500 MHz

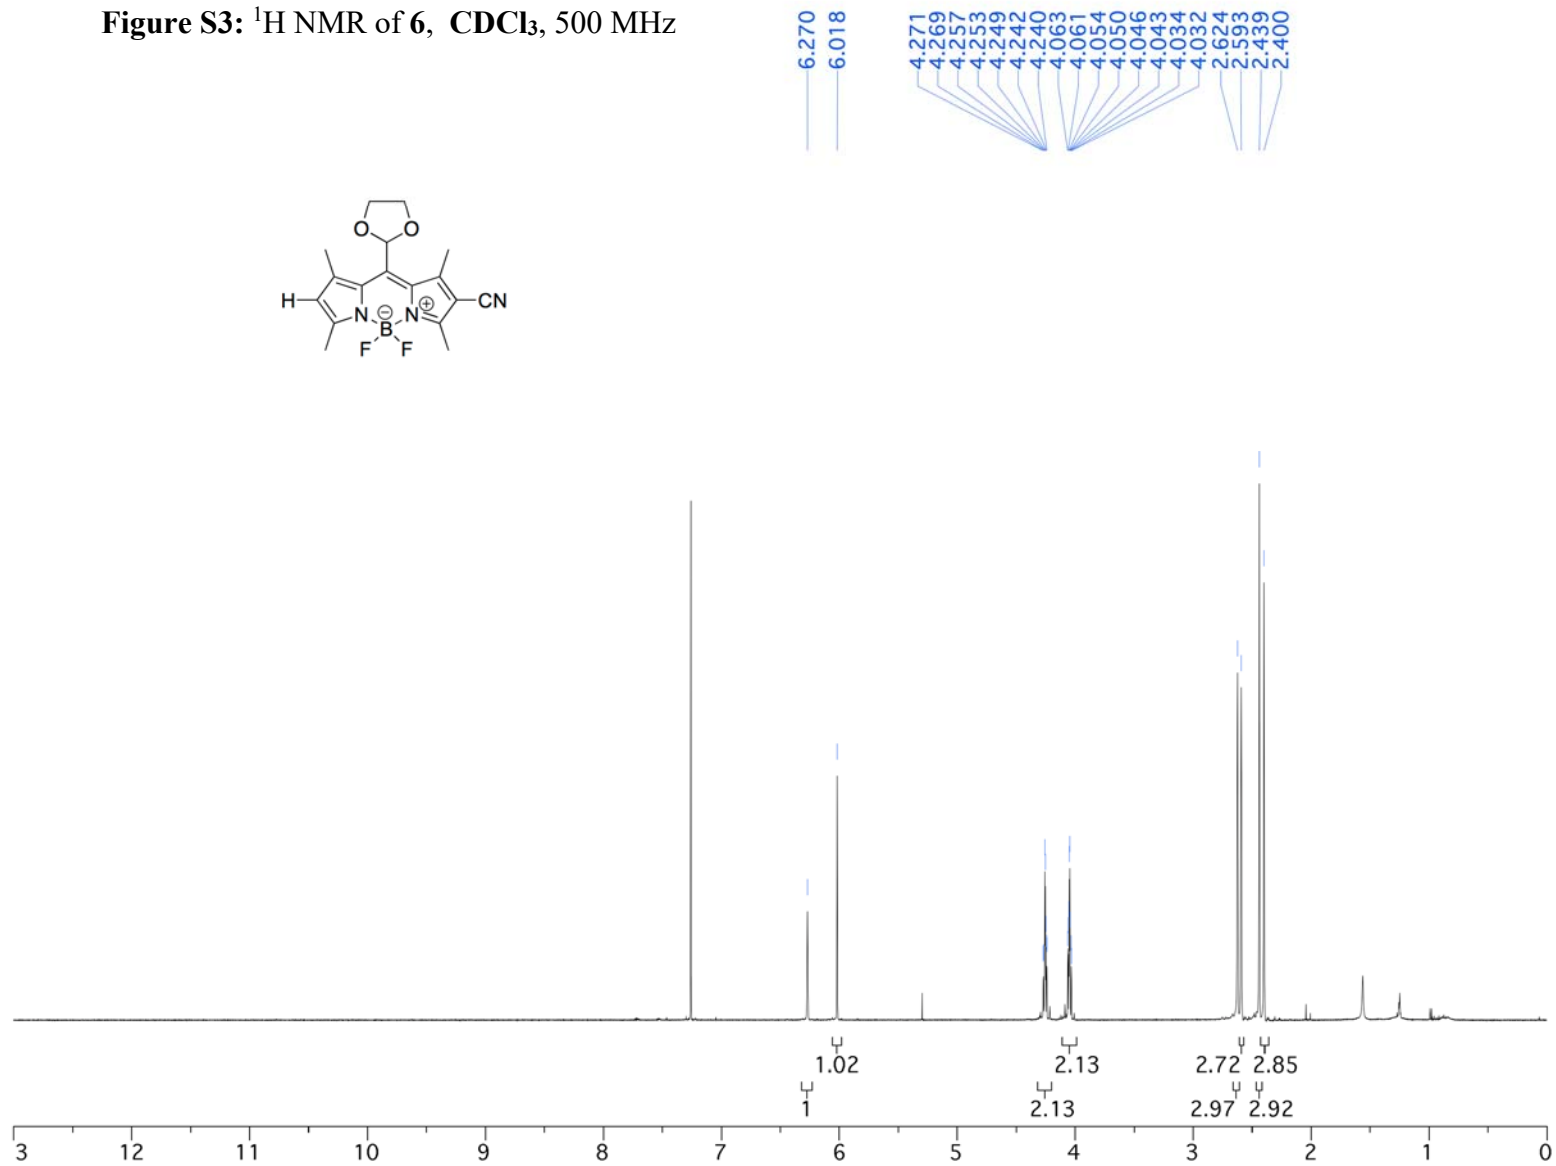

**Figure S3:**

$^{13}\text{C}$  NMR of **6**,  $\text{CDCl}_3$ ,  
126 MHz

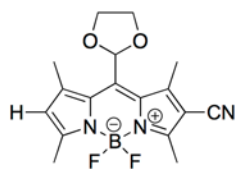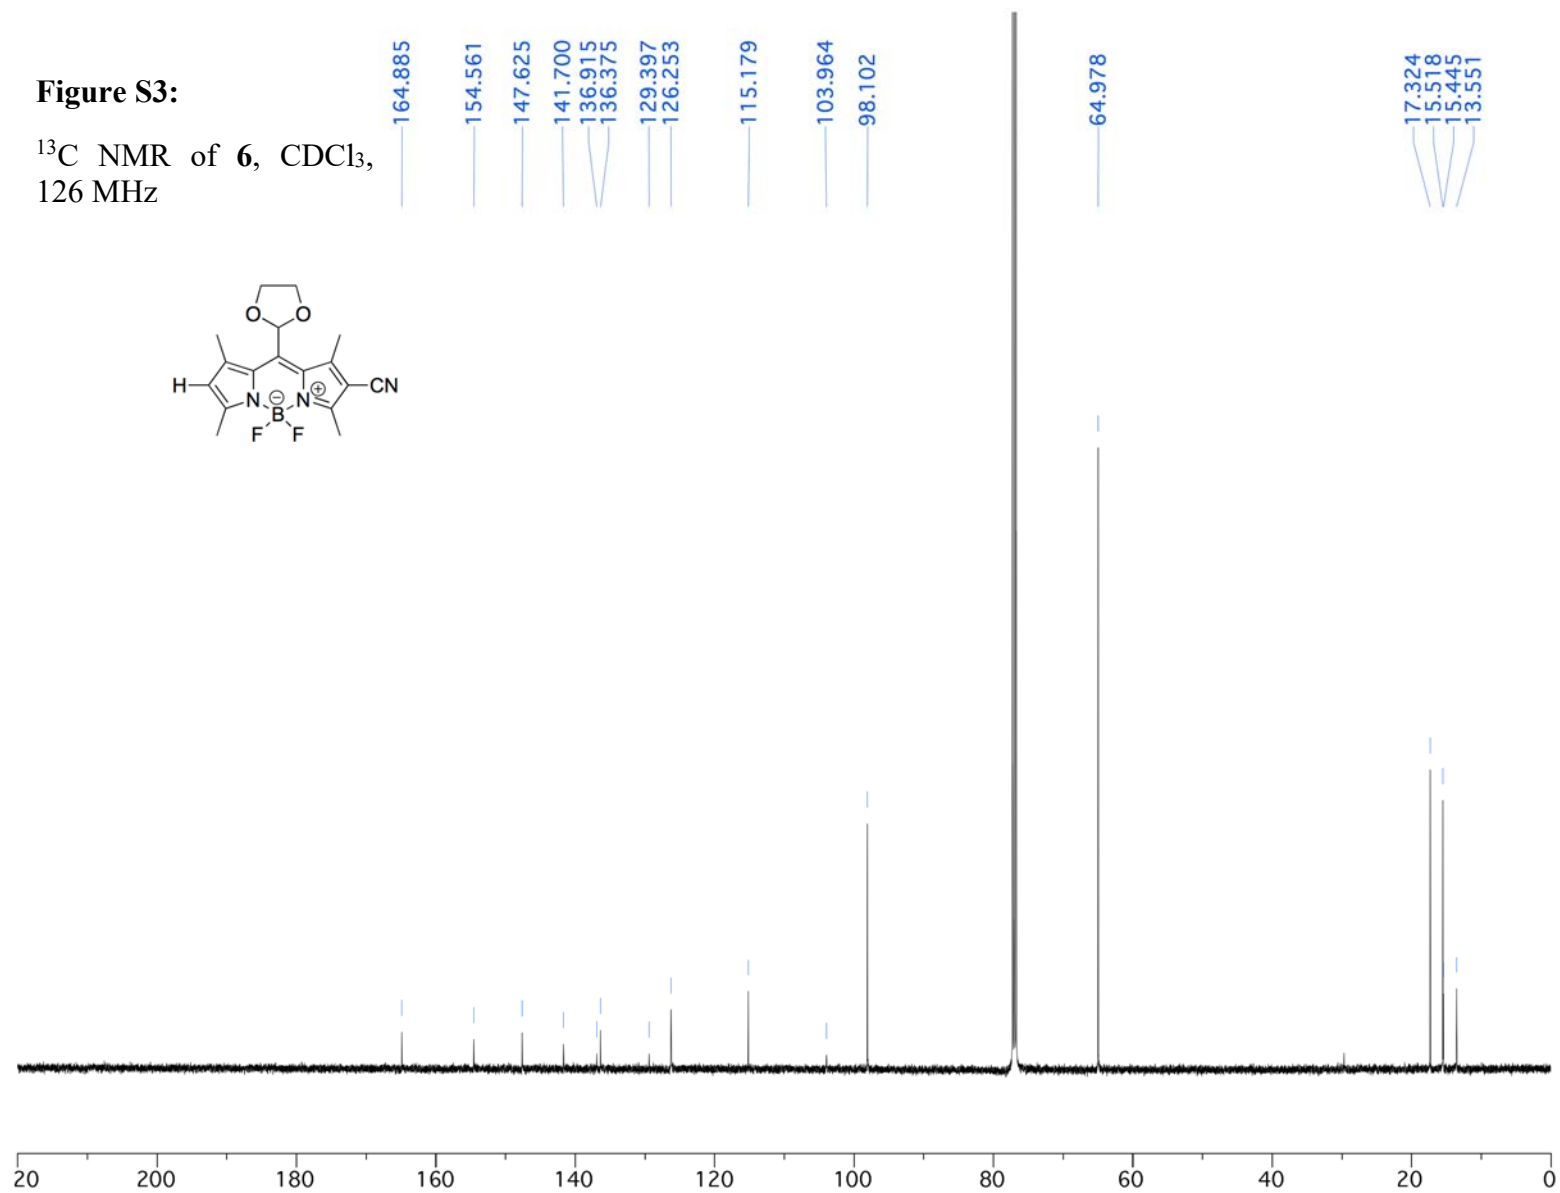

Supplement: ao7b01795_si_001.pdf [file ao7b01795_si_001.pdf]
